# Supplementary material for: The landscape of somatic copy-number alteration across human cancers
Source: Springer Nature journal article supplement (doi:10.1038/nature08822), 2010-02-01
Supplement: 41586_2010_BFnature08822_MOESM284_ESM.xls [file 41586_2010_BFnature08822_MOESM284_ESM.xls]

## Sheet: Sheet1
Supplementary Table 1: Tissue types represented in the sample set
Tumor Type	# Samples	# Cell Line	# Tissue	# Published†	# Unpublished	Ref
Lung NSC	733	105	628	510	223	9,10,13,58,68
Acute lymphoblastic leukemia	391	13	378	388	3	10,11,12
Breast	243	50	193	130	113	1,2,10
Myeloproliferative disorder	215	0	215	215	0	8
Colorectal	161	33	128	151	10	10,28
Medulloblastoma	128	9	119	2	126	10
Renal	126	27	99	111	15	7,10
Hepatocellular	121	11	110	106	15	3,10
Melanoma	111	108	3	77	34	4,10
Ovarian	103	7	96	7	96	10
Prostate	92	9	83	54	38	6,10
Esophageal adenocarcinoma	73	0	73	73	0	Bass et al, in preparation
Dedifferentiated liposarcoma	53	2	51	52	1	Barretina et al, in review
Esophageal squamous	44	12	32	40	4	10,13
GIST	43	6	37	21	22	Barretina et al, in review
Glioma	41	13	28	10	31	10
Lung SC	40	23	17	21	19	10
Myxofibrosarcoma	36	0	36	36	0	Barretina et al, in review
Leiomyosarcoma	33	6	27	32	1	10; Barretina et al, in review
Neuroblastoma	31	6	25	31	0	5,10
Synovial sarcoma	30	4	26	25	5	Barretina et al, in review
Mesothelioma	26	8	18	26	0	Brachmann et al, in preparation
Pleomorphic liposarcoma	24	0	24	24	0	Barretina et al, in review
Gastric	23	10	13	23	0	10; Bass et al, in preparation
Thyroid	23	14	9	4	19	10
Non-Hodgkin's lymphoma	21	21	0	21	0	10
Miscellaneous*	166	114	52	115	51	10; Barretina et al, in review
Totals	3131	611	2520	2305	826
* Includes tissue and cell line samples from cancer types with 20 or fewer total samples, including:
Hematopoietic Cancers (Myelodysplasia, B-Cell Neoplasms, Acute and Chronic Leukemia, Hodgkin's Lymphoma, and Multiple Myeloma
Sarcoma Cancers (Liposarcoma, Osteosarcoma, Rhabdomyosarcoma, and Fibrosarcoma)
Epithelial Cancers (Bladder, Pancreatic, Cervical, Esophageal, Endometrial, and Head and Neck)
Neural Cancers (Meningioma, Schwannoma, and Retinoblastoma)
† # Published includes manuscripts in review that represent primary publications
