# Supplementary material for: The landscape of somatic copy-number alteration across human cancers
Source: Springer Nature journal article supplement (doi:10.1038/nature08822), 2010-02-01
Supplement: 41586_2010_BFnature08822_MOESM289_ESM.xls [file 41586_2010_BFnature08822_MOESM289_ESM.xls]

## Sheet: Sheet 1
Supplementary Table 6: Segregation of Significant Arm-Level Events
Across Tissue Type Boundaries
Comparison between		Enriched in*
Group 1	Group 2	Group 1	Group 2
Hematopoietic	Rest		Gains of 7, 20, 5p
Epithelial	Non-Epithelial	Gains of 8q, 12p, 1q, 3q, 20; Losses of 17p, 19p, 4, 8p	Gains of 21q; Losses of 14q, 10
Sarcoma	Neural-like	Gains of 5p	Gains of 12p, 7q, 1q, 20p; Losses of 4p, 9q, 14q, 19q, 1p
*Determined by comparative marker selection, FDR q < 0.25; events ordered by decreasing significance
